# Supplementary material for: Opportunities behind the unusual ability of geobacter sulfurreducens for exocellular respiration and electricity production
Source: Royal Society of Chemistry journal article supplement (doi:10.1039/c1ee01067k), 2011-01-01

## Supplementary material

# Opportunities behind the unusual ability of *Geobacter sulfurreducens* for exocellular respiration and electricity production.

Abraham Esteve-Núñez<sup>1\*</sup>, Juan Pablo Busalmen<sup>2\*</sup>, Antonio Berná<sup>3</sup>, Cristina Gutiérrez-Garrán<sup>1</sup> and Juan Miguel Feliu<sup>3</sup>.

1. \*Dr. A. Esteve-Núñez and Ms. Cristina Gutiérrez-Garrán. Departamento de Ingeniería Química, Universidad de Alcalá de Henares, Alcalá de Henares, Spain. E-mail: [estevena@gmail.com](mailto:estevena@gmail.com)

2. \*Dr. J. P. Busalmen. Laboratorio de Bioelectroquímica, INTEMA(CONICET), Universidad Nacional de Mar del Plata. Juan B. Justo 4302, B7608FDQ, Mar del Plata, Argentina. E-mail: [jbusalme@fi.mdp.edu.ar](mailto:jbusalme@fi.mdp.edu.ar)

3. Dr. A. Berná and Dr. J. M. Feliu. Instituto de Electroquímica, Universidad de Alicante. Apartado de Correos 99, 03080, Alicante, Spain. E-mail: [juan.feliu@ua.es](mailto:juan.feliu@ua.es)

**Acknowledgements:** This work was supported by the European Union through the FP7, BacWire project (Contract N°: NMP4-SL-2009-229337). Partial support by the ANCPyT, Argentina (project: PICT 22050) and the MICINN, Spain (project: CTQ2006-04071/BQU) is also acknowledged.

**Figure S1:** ATR-SEIRAS spectra during the adsorption process of cells on a thin-film gold electrode. The electrode was polarized to 0.2 V in the corresponding electrolyte under a N<sub>2</sub>:CO<sub>2</sub> (80:20) atmosphere. After acquiring the spectrum corresponding to the electrode / electrolyte interface a bacterial suspension (10<sup>9</sup> cell ml<sup>-1</sup>) was added to the cell. Single beam spectra were recorded with a 5 min time interval after the addition of cells. A.U.: arbitrary units.

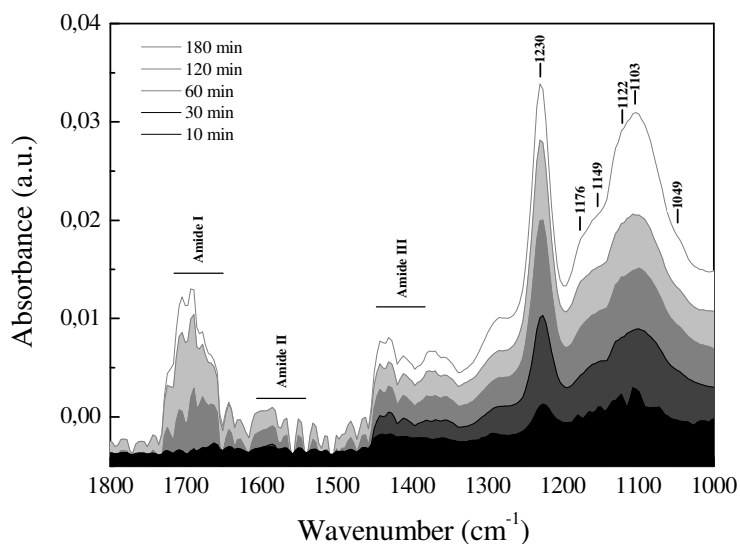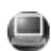

**Figure S2:** Fold change in the fluorescence intensity of *G. sulfureducens* cells grown under electron donor or electron acceptor limitation. Variability within measurements was less than 10%.

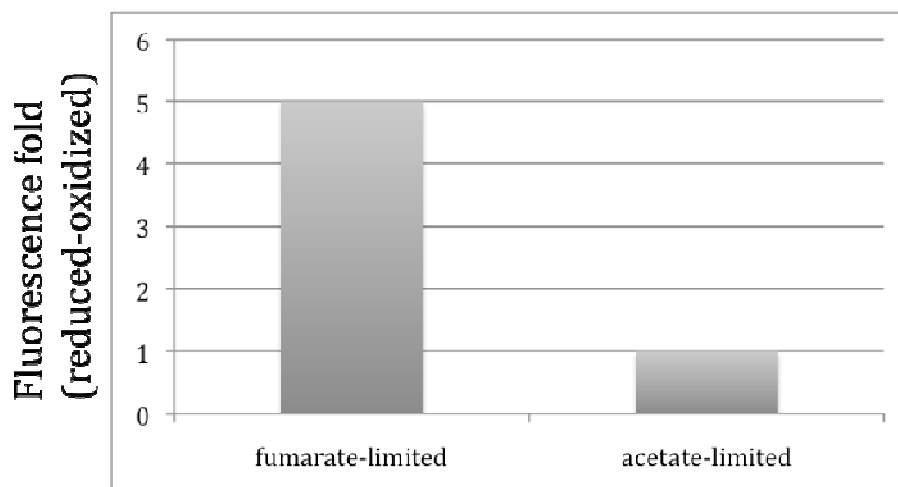

Supplement: c1ee01067k.pdf [file c1ee01067k.pdf]
